# Supplementary material for: Mineralogical properties and internal structures of individual fine particles of Saharan dust
Source: Copernicus journal article supplement (doi:10.5194/acp-2016-308), 2016-04-15
Supplement: Supplementary file 1 [file acp-2016-308-supplement.pdf]

Supplementary Table 1. Ratio of three axes of ellipsoidal particles and their Fe (hydr)oxide contents.

| Particle No.       | Axis |     |     | Fe (hydr)oxides    |      |
|--------------------|------|-----|-----|--------------------|------|
|                    | c    | b   | a   | volume %           |      |
| 1                  | 1.4  | 1.0 | 0.3 | 1.2                |      |
| 2                  | 1.3  | 1.0 | 0.8 | 0.6                |      |
| 3                  | 1.1  | 1.0 | 0.5 | 50.0               |      |
| 4                  | 1.3  | 1.0 | 0.1 | 0.0                |      |
| 5                  | 1.1  | 1.0 | 0.3 | 0.5                |      |
| 6                  | 1.3  | 1.0 | 0.1 | 3.5                |      |
| 7                  | 1.3  | 1.0 | 0.3 | 1.7                |      |
| 8                  | 2.0  | 1.0 | 0.3 | 5.5                |      |
| 9                  | 1.3  | 1.0 | 0.3 | 0.0                |      |
| 10                 | 1.1  | 1.0 | 0.3 | 2.9                |      |
| 11                 | 1.5  | 1.0 | 0.6 | 9.4                |      |
| 12                 | 1.6  | 1.0 | 0.5 | 55.7               |      |
| 13                 | 1.3  | 1.0 | 0.3 | 0.0                |      |
| 14                 | 1.2  | 1.0 | 0.6 | 91.2               |      |
| 15                 | 1.2  | 1.0 | 0.8 | 5.0                |      |
| 16                 | 1.7  | 1.0 | 0.4 | 0.5                |      |
| 17                 | 1.9  | 1.0 | 0.1 | 3.6                |      |
| 18                 | 2.0  | 1.0 | 0.7 | 0.0                |      |
| 19                 | 1.7  | 1.0 | 0.5 | 2.0                |      |
| 20                 | 1.1  | 1.0 | 0.3 | 8.6                |      |
| 21                 | 1.1  | 1.0 | 0.5 | 3.0                |      |
| 22                 | 1.2  | 1.0 | 0.4 | 1.5                |      |
| 23                 | 1.5  | 1.0 | 0.3 | 0.8                |      |
| 24                 | 1.2  | 1.0 | 0.3 | 6.7                |      |
| 25                 | 1.4  | 1.0 | 0.9 | 0.4                |      |
| 26                 | 1.2  | 1.0 | 0.5 | 0.8                |      |
| 27                 | 1.0  | 1.0 | 0.8 | 7.7                |      |
| 28                 | 1.5  | 1.0 | 0.7 | 0.7                |      |
| 29                 | 1.4  | 1.0 | 0.6 | 1.2                |      |
| 30                 | 1.2  | 1.0 | 0.6 | 0.6                |      |
| 31                 | 1.2  | 1.0 | 0.5 | 0.0                |      |
| 32                 | 2.0  | 1.0 | 1.0 | 0.0                |      |
| 33                 | 1.2  | 1.0 | 0.2 | 9.1                |      |
| 34                 | 1.4  | 1.0 | 0.2 | 1.0                |      |
| 35                 | 1.5  | 1.0 | 0.9 | 1.2                |      |
| 36                 | 1.8  | 1.0 | 0.5 | 2.3                |      |
| 37                 | 1.2  | 1.0 | 0.8 | 0.1                |      |
| 38                 | 1.1  | 1.0 | 0.6 | 10.4               |      |
| 39                 | 1.5  | 1.0 | 0.3 | 10.1               |      |
| 40                 | 1.1  | 1.0 | 0.9 | 2.6                |      |
| 41                 | 1.4  | 1.0 | 0.4 | 0.0                |      |
| 42                 | 1.4  | 1.0 | 0.2 | 3.2                |      |
| 43                 | 1.1  | 1.0 | 0.4 | 15.0               |      |
| 44                 | 1.3  | 1.0 | 1.0 | 1.9                |      |
| 45                 | 1.4  | 1.0 | 0.1 | 27.6               |      |
| 46                 | 1.6  | 1.0 | 0.6 | 4.2                |      |
| 47                 | 1.6  | 1.0 | 0.2 | 0.1                |      |
| 48                 | 1.7  | 1.0 | 1.0 | 0.0                |      |
| Average            | 1.4  | 1.0 | 0.6 | Average            | 3.5* |
| Standard deviation | 0.3  |     | 0.3 | Standard deviation | 5.1  |
| Median             | 1.3  |     | 0.5 | Median             | 1.8  |

\*Excluding exceptionally high Fe oxide contents (particle 3, 12, 14)

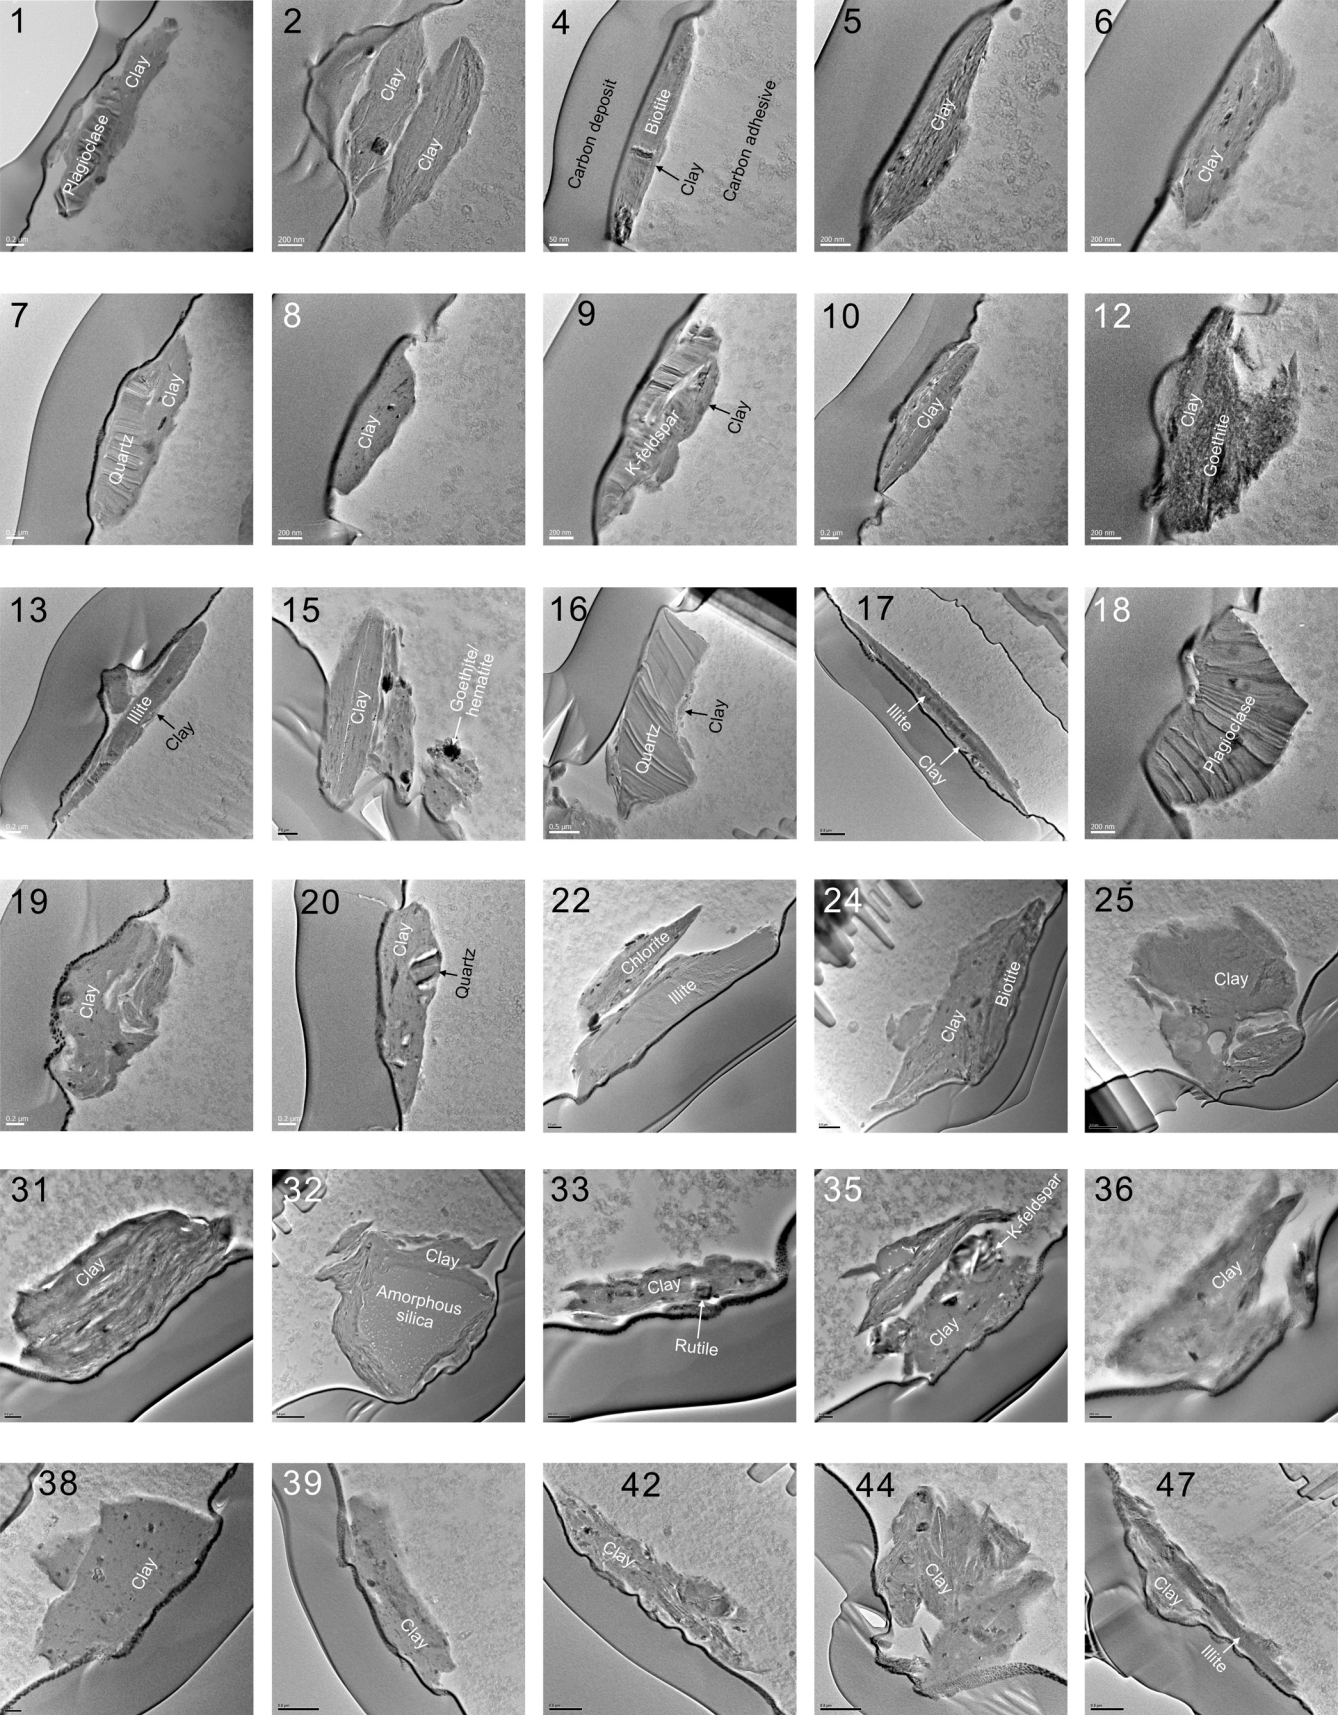

**Supplementary Figure 1.** TEM images of the cross sections of 30 dust particles not presented in the text.
